# Supplementary material
Source: PubMed Central journal article supplement (PMC552919)

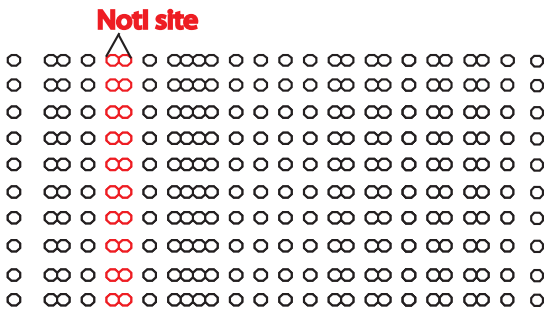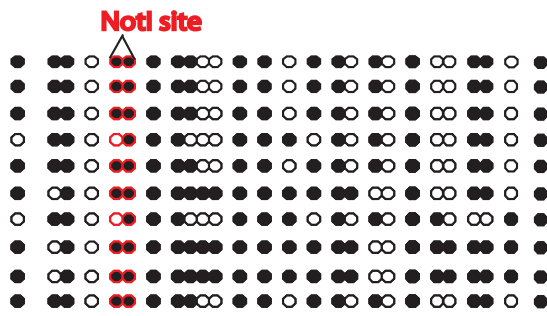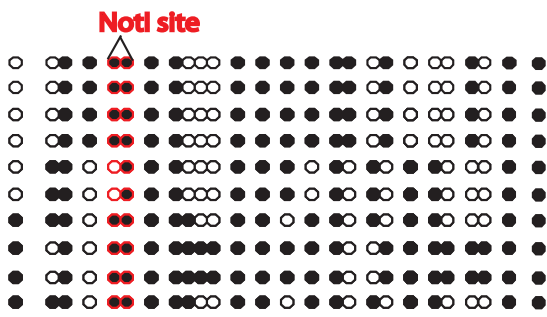

● Methylated      ○ Unmethylated

Supplement: pnas_102_9_3336__1.pdf [file pnas_102_9_3336__1.pdf]

Mouse 1

Mouse 2

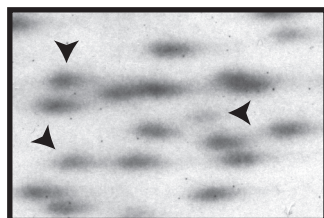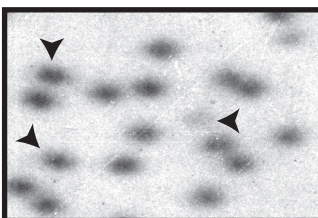

Testis

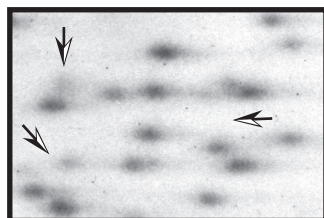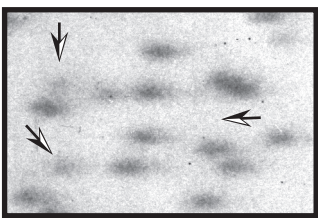

Brain

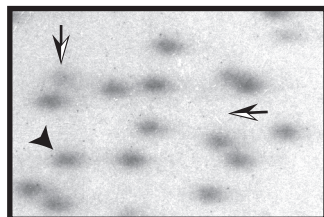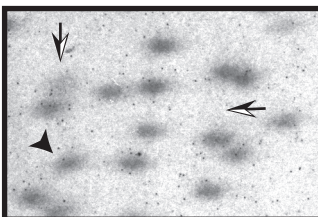

Kidney

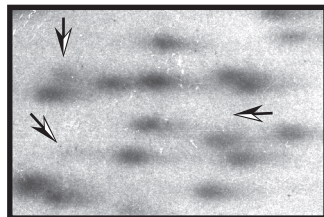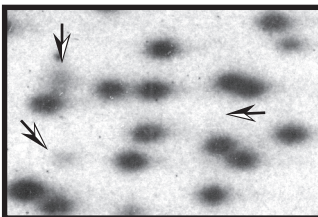

Liver

◄ Spot Present

↔ Spot Reduced or Absent

Supplement: pnas_102_9_3336__2.pdf [file pnas_102_9_3336__2.pdf]

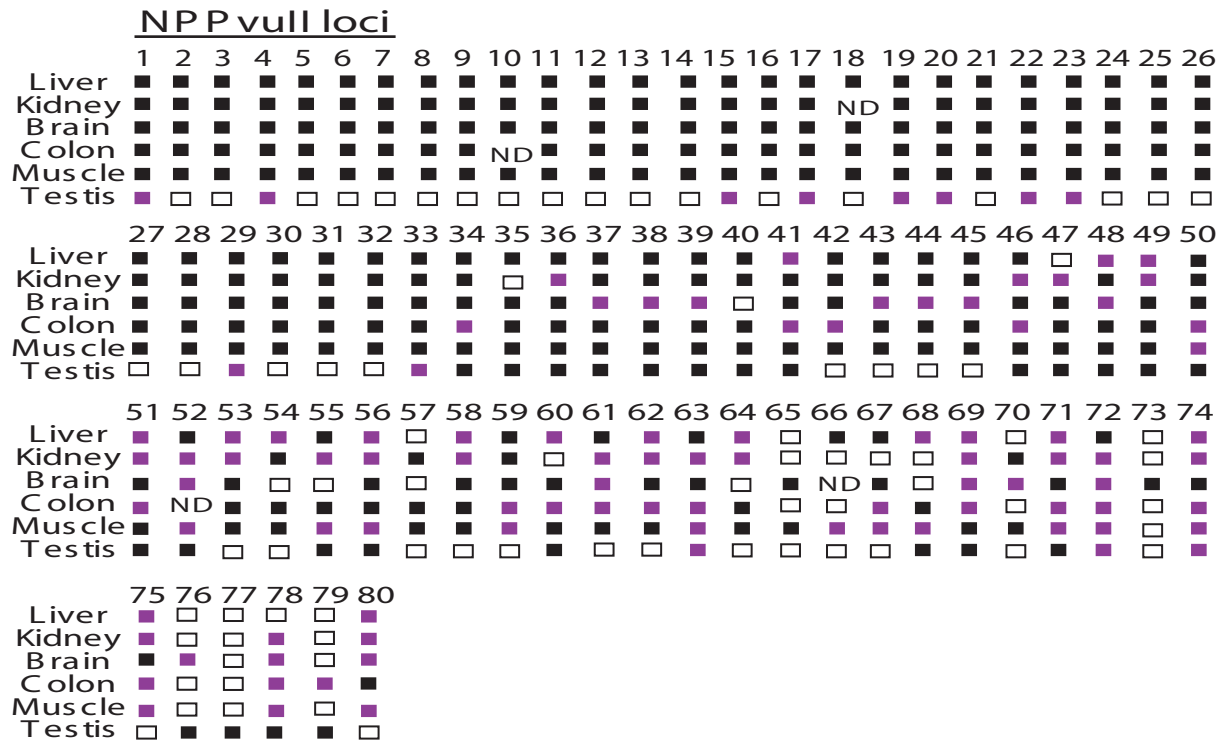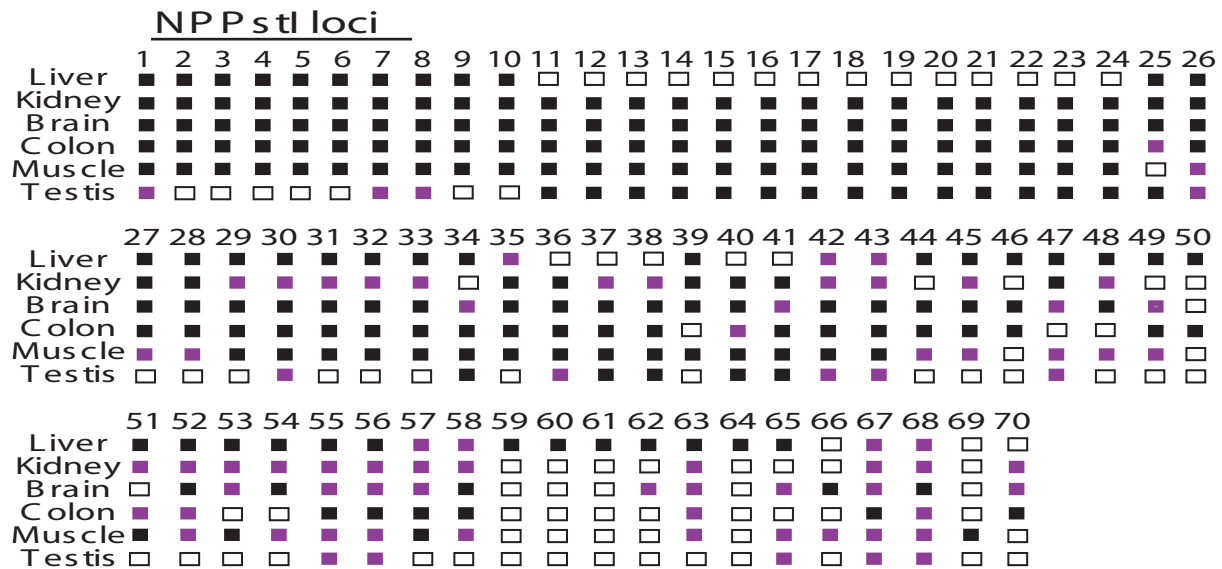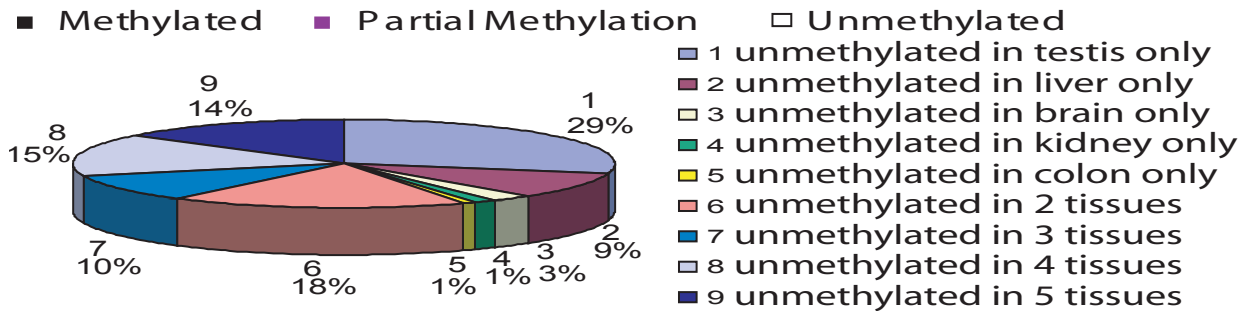

Supplement: pnas_102_9_3336__3.pdf [file pnas_102_9_3336__3.pdf]

**a**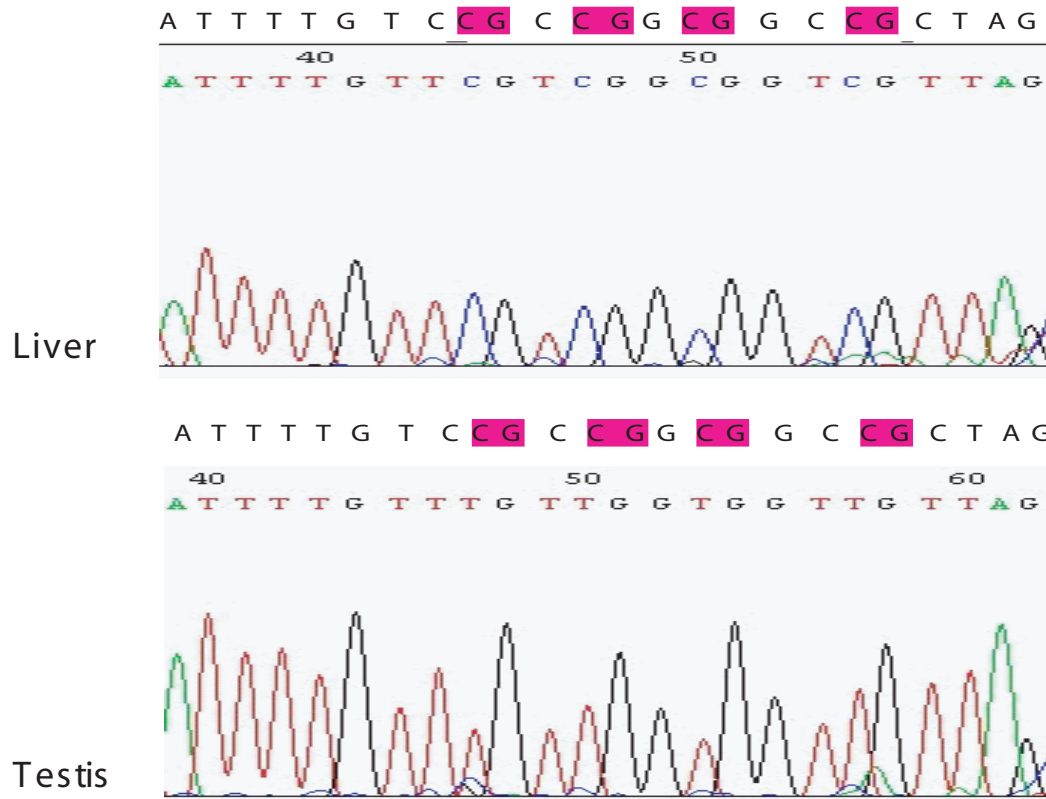**b**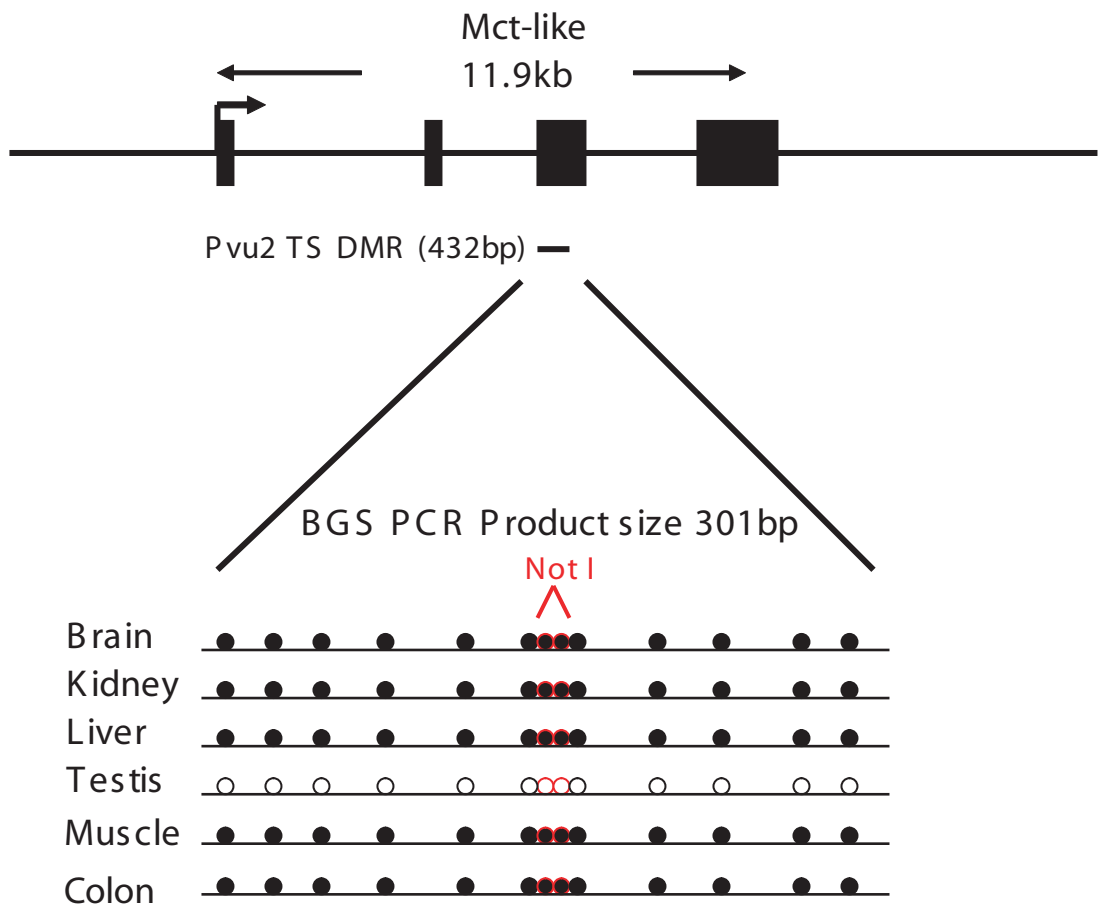

Supplement: pnas_102_9_3336__4.pdf [file pnas_102_9_3336__4.pdf]

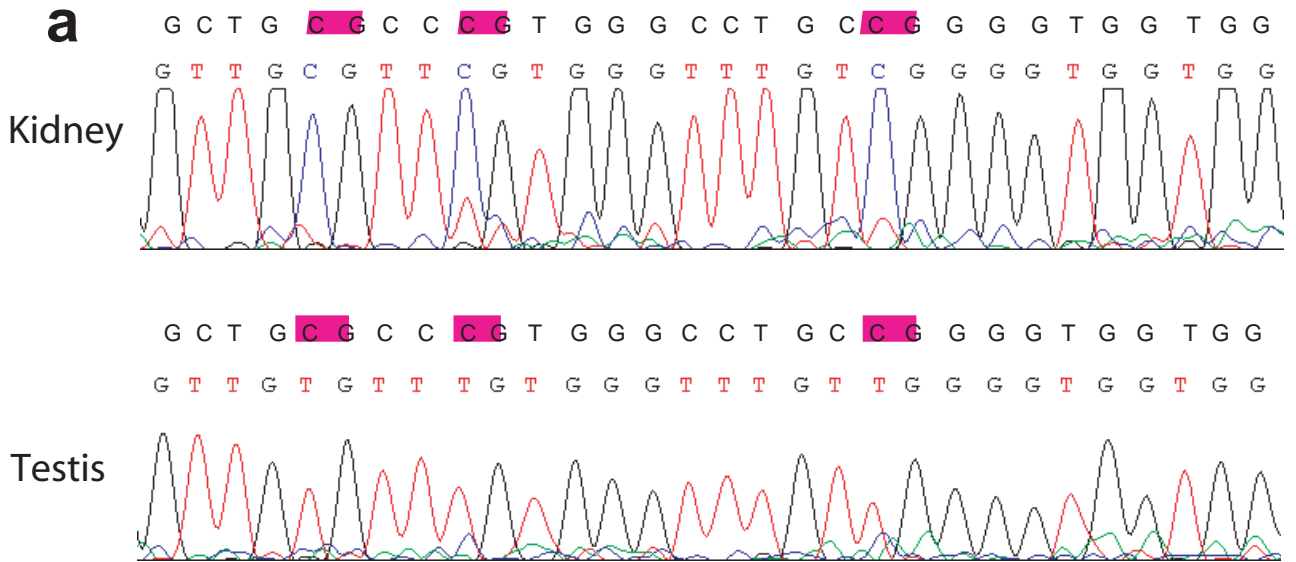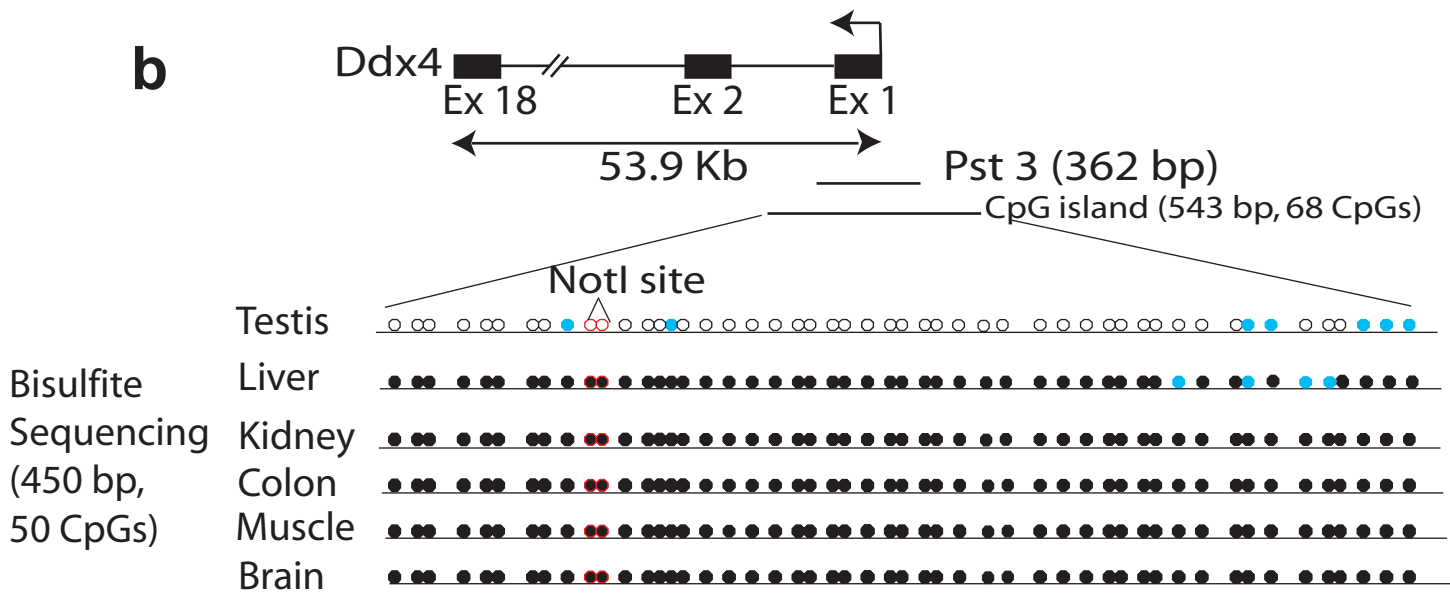

Fig. 6 ( 131bp, 26 CpGs)

- Methylated
- Partial methylated
- Unmethylated

Supplement: pnas_102_9_3336__5.pdf [file pnas_102_9_3336__5.pdf]
